# Supplementary material
Source: PubMed Central journal article supplement (PMC4169005)
Supplement: NIHMS488934-supplement-supplement_1.pdf [file NIHMS488934-supplement-supplement_1.pdf]

## Supplemental data

**Table 1.** Frequency of GFP<sup>+</sup> cells in the neointima and adventitia of experimental AVFs\*

|                                | Neointima        |                                   |                                   | Adventitia       |                                   |                                   |
|--------------------------------|------------------|-----------------------------------|-----------------------------------|------------------|-----------------------------------|-----------------------------------|
|                                | GFP <sup>+</sup> | GFP <sup>+</sup> SMA <sup>+</sup> | GFP <sup>-</sup> SMA <sup>+</sup> | GFP <sup>+</sup> | GFP <sup>+</sup> SMA <sup>+</sup> | GFP <sup>-</sup> SMA <sup>+</sup> |
| <b>AVF in Chimeric Rats</b>    |                  |                                   |                                   |                  |                                   |                                   |
| GFP BM into WT #1              | 70/450           | 0/450                             | 380/450                           | 345/815          | 18/815                            | 56/815                            |
| GFP BM into WT #2              | 30/560           | 2/560                             | 530/560                           | 158/675          | 0/675                             | 71/675                            |
| GFP BM into WT #3              | 16/350           | 1/350                             | 334/350                           | 321/514          | 0/514                             | 18/514                            |
| GFP BM into WT #4              | 21/589           | 0/589                             | 568/589                           | 71/214           | 7/214                             | 24/214                            |
| GFP BM into WT #5              | 14/600           | 2/600                             | 586/600                           | 124/354          | 1/354                             | 37/354                            |
| GFP BM into WT #6              | 12/470           | 0/470                             | 458/470                           | 189/426          | 0/426                             | 61/426                            |
| <b>AVF using Aortic Grafts</b> |                  |                                   |                                   |                  |                                   |                                   |
| GFP Aorta into WT #1           | 0/346            | 0/346                             | 340/346                           | 4/1232           | 0/1232                            | 59/1232                           |
| GFP Aorta into WT #2           | 1/545            | 0/545                             | 530/545                           | 1/932            | 0/932                             | 10/932                            |
| GFP Aorta into WT #3           | 0/238            | 0/238                             | 214/238                           | 0/435            | 0/435                             | 35/435                            |
| GFP Aorta into WT #4           | 0/445            | 0/445                             | 440/445                           | 3/638            | 0/638                             | 23/638                            |
| WT Aorta into GFP #1           | 489/495          | 473/495                           | 6/495                             | 200/253          | 23/253                            | 0/253                             |
| WT Aorta into GFP #2           | 110/119          | 111/119                           | 8/119                             | 213/213          | 40/213                            | 0/213                             |
| WT Aorta into GFP #3           | 248/252          | 248/252                           | 4/252                             | 450/450          | 58/450                            | 0/450                             |
| <b>Composite AVF</b>           |                  |                                   |                                   |                  |                                   |                                   |
| GFP Graft #1                   | 293/383          | 223/363                           | 70/363                            | 240/288          | 14/288                            | 1/288                             |
| GFP Graft #2                   | 563/580          | 558/580                           | 0/580                             | 312/411          | 51/411                            | 0/411                             |
| GFP Graft #3                   | 350/359          | 349/359                           | 8/359                             | 240/258          | 6/258                             | 0/258                             |
| WT Vein #1                     | 0/244            | 0/244                             | 235/244                           | 3/468            | 0/468                             | 4/468                             |
| WT Vein #2                     | 8/483            | 2/483                             | 465/483                           | 0/235            | 0/235                             | 21/235                            |
| WT Vein #3                     | 6/100            | 0/100                             | 93/100                            | 2/247            | 0/247                             | 12/247                            |

\*Three AV fistula models were used to demonstrate the origin of neointimal cells. Values represent the number of GFP<sup>+</sup>, GFP<sup>+</sup>SMA<sup>+</sup> or GFP<sup>-</sup>SMA<sup>+</sup> cells versus the total number of cells examined in at least four sections from four different location in the fistula.

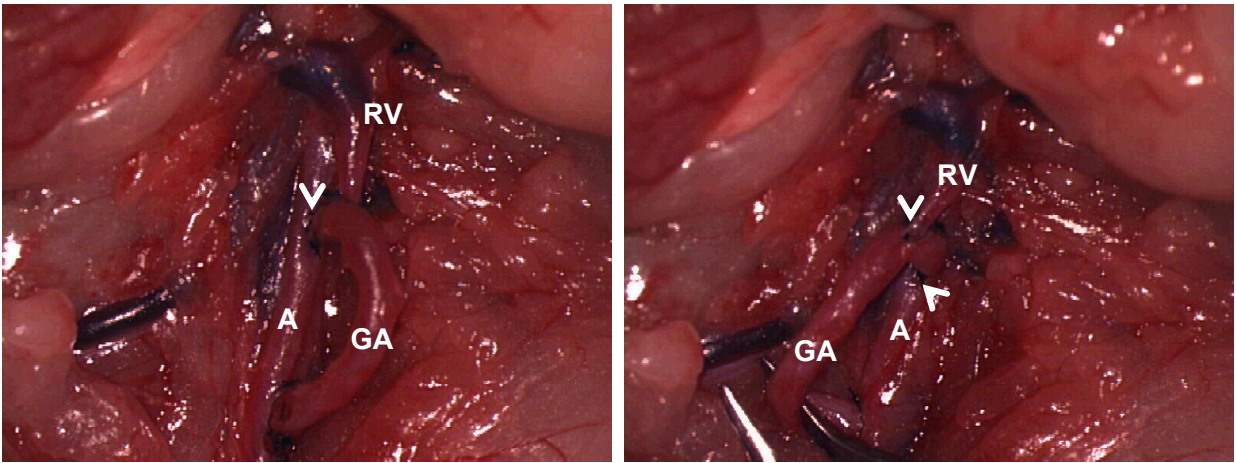

**Figure I** Microphotographs of a representative fistula created using a GFP aortic graft orthotopically transplanted to a WT rat. Anastomosis points are marked with arrows. **RV** : renal vein; **GA**: GFP aorta (graft); **A**: Aorta.

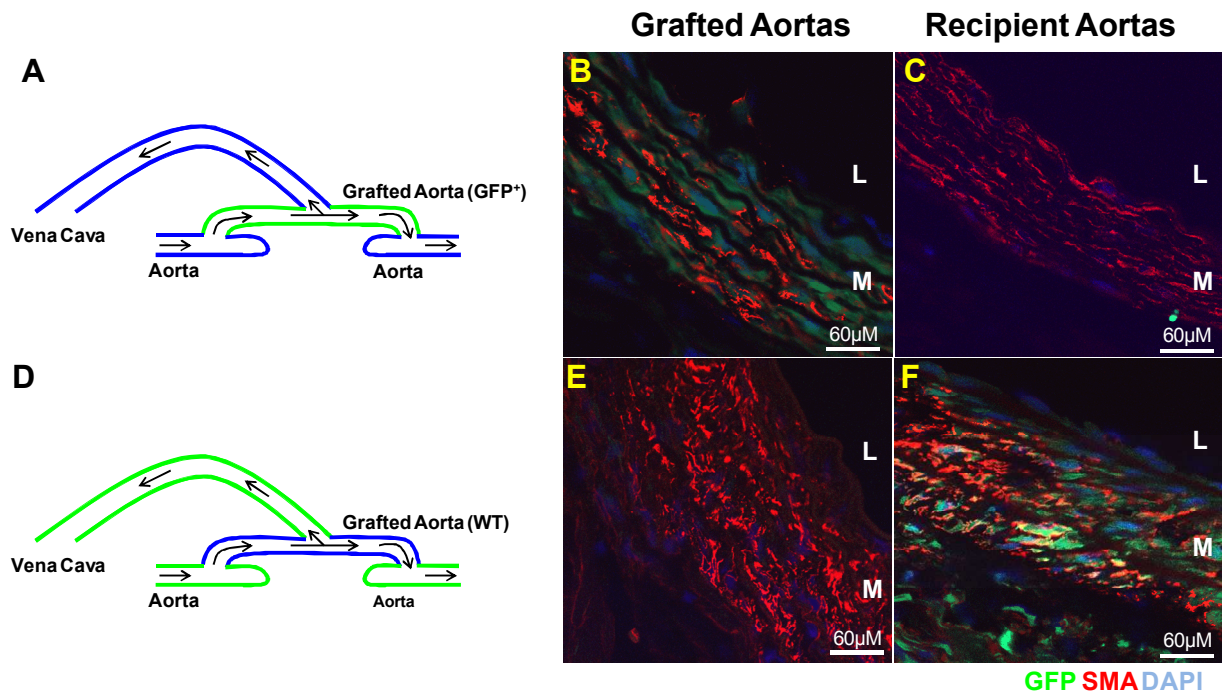

**Figure II A and D.** Diagrammatic representations of AV fistulas constructed in WT (A) or GFP (D) recipients using previously transplanted GFP (A) or WT (D) arterial limbs, respectively. Grafted and recipient aortas were harvested along the AV fistula, embedded in OCT for cryosectioning and stained with an antibody against smooth muscle actin (SMA, red). **B.** Representative section from the GFP graft. VSMC in the graft expressed the transgene (GFP, green) at the time of sacrificing which confirmed the absence of subclinical anti-GFP immunoreactivity that may hamper the proliferation of graft-derived cells into the recipient vein. **C.** WT recipient aorta. **E and F** Sections from the WT grafted (E) and GFP recipient aortas. SMA positive cells are shown in red, GFP in green and nuclei in blue (DAPI). M: Media; L: Lumen

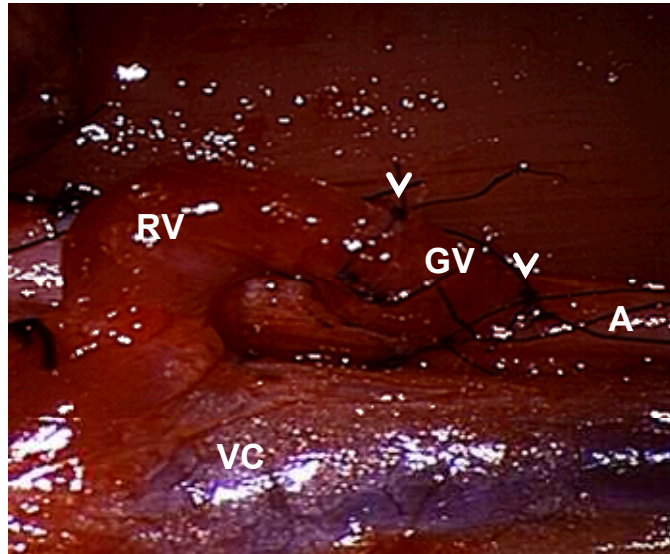

**Figure III** Microphotography of a composite AV fistula created by interposing the vena cava of a GFP rat between the recipient renal vein and the aorta of a WT recipient. Anastomosis points are marked with arrows. **RV**: renal vein; **GV**: GFP vein (graft); **A**: Aorta and **VC**: vena cava.
